# Supplementary material for: Uncovering the natural variability of araucariacean exudates from ex situ and in situ tree populations in New Caledonia using FTIR spectroscopy
Source: PeerJ journal article supplement (doi:10.7717/peerj-achem.17), 2022-05-25
Supplement: NCexudates_SI_files_revised_staff_KT.pdf [file NCexudates_SI_files_revised_staff_KT.pdf]

**Uncovering the natural variability of araucariacean exudates from ex situ and in situ tree populations in New Caledonia**

Seyfullah et al.

**Supplementary Table S1. List of exudates interpreted using FTIR in species from New Caledonia**

| Genus, species          | Locality                                    | Sample reference | Exudate type determined using FTIR |
|-------------------------|---------------------------------------------|------------------|------------------------------------|
| <b><i>Araucaria</i></b> |                                             |                  |                                    |
| <i>bidwillii</i>        | Arboretum                                   | Bid 1            | Resin                              |
|                         | Arboretum                                   | Bid 2            | Gum resin                          |
| <i>columnaris</i>       | Wild at Bourail                             | Col 1            | Gum resin                          |
|                         | Wild at Bourail                             | Col 2            | Gum resin                          |
|                         | Wild at Bourail                             | Col 3            | Gum resin                          |
|                         | Wild at Bourail                             | Col 4            | Resin                              |
|                         | Wild at Bourail                             | Col 5            | Gum resin                          |
|                         | Wild at Bourail                             | Col 6            | Gum resin                          |
|                         | Wild at Bourail                             | Col 7            | Gum resin                          |
|                         | Wild at Bourail                             | Col 8            | Gum resin                          |
|                         | Wild at Bourail                             | Col 9            | Gum resin                          |
| <i>cunninghamii</i>     | Arboretum                                   | Cun 1            | Gum resin                          |
|                         | Arboretum                                   | Cun 2            | Gum resin                          |
|                         | Arboretum                                   | Cun 3            | Resin                              |
|                         | Arboretum                                   | Cun 4            | Gum resin                          |
| <i>luxurians</i>        | Arboretum                                   | Lux 1            | Gum resin                          |
| <i>muelleri</i>         | Arboretum                                   | Muel 1           | Gum resin                          |
| <i>nemorosa</i>         | Wild at Port Boisé                          | Nem 1            | Gum resin                          |
|                         | Wild at Port Boisé                          | Nem 2            | Gum resin                          |
|                         | Wild at Port Boisé                          | Nem 3            | Gum                                |
|                         | Wild at Port Boisé                          | Nem 4            | Resin                              |
|                         | Wild at Port Boisé                          | Nem 5            | Resin                              |
|                         | Wild at Port Boisé                          | Nem 6            | Resin                              |
|                         | Wild at Port Boisé                          | Nem 7            | Resin                              |
|                         | Wild at Port Boisé                          | Nem 8            | Resin                              |
| <b><i>Agathis</i></b>   |                                             |                  |                                    |
| <i>corbassonii</i>      | Arboretum                                   | Cor 1            | resin                              |
|                         | Arboretum                                   | Cor 2            | resin                              |
|                         | Arboretum                                   | Cor 3            | resin                              |
|                         | Arboretum                                   | Cor 4            | resin                              |
|                         | Arboretum                                   | Cor 5            | resin                              |
|                         | Arboretum                                   | Cor 6            | resin                              |
|                         | Arboretum                                   | Cor 7            | resin                              |
|                         | Arboretum                                   | Cor 8            | resin                              |
|                         | Arboretum                                   | Cor 9            | resin                              |
|                         | Arboretum                                   | Cor 10           | resin                              |
| <i>lanceolata</i>       | Arboretum                                   | Lan 1            | resin                              |
|                         | Arboretum                                   | Lan 2            | resin                              |
|                         | Arboretum                                   | Lan 3            | resin                              |
|                         | Wild at Parc Provincial de la Rivière Bleue | Lan 21           | resin                              |
|                         | Wild at Parc Provincial de la Rivière Bleue | Lan 22           | resin                              |
|                         | Wild at Parc Provincial de la Rivière Bleue | Lan 23           | resin                              |

**Uncovering the natural variability of araucariacean exudates from ex situ and in situ tree populations in New Caledonia**

Seyfullah et al.

**Supplementary Table S1. Continued.**

| Genus, species     | Locality                                    | Sample reference | Exudate type determined using FTIR |
|--------------------|---------------------------------------------|------------------|------------------------------------|
|                    | Wild at Parc Provincial de la Rivière Bleue | Lan 24           | resin                              |
|                    | Wild at Parc Provincial de la Rivière Bleue | Lan 25           | resin                              |
|                    | Wild at Parc Provincial de la Rivière Bleue | Lan 26           | resin                              |
|                    | Wild at Parc Provincial de la Rivière Bleue | Lan 27           | resin                              |
|                    | Wild at Parc Provincial de la Rivière Bleue | Lan 28           | resin                              |
|                    | Wild at Parc Provincial de la Rivière Bleue | Lan 29           | resin                              |
|                    | Wild at Parc Provincial de la Rivière Bleue | Lan 30           | resin                              |
|                    | Wild at Parc Provincial de la Rivière Bleue | Lan 31           | resin                              |
| <i>macrophylla</i> | Arboretum                                   | Mac 1            | resin                              |
|                    | Arboretum                                   | Mac 2            | resin                              |
|                    | Arboretum                                   | Mac 3            | resin                              |
|                    | Arboretum                                   | Mac 4            | resin                              |
|                    | Arboretum                                   | Mac 5            | resin                              |
|                    | Arboretum                                   | Mac 5            | resin                              |
|                    | Arboretum                                   | Mac 7            | resin                              |
|                    | Arboretum                                   | Mac 8            | resin                              |
|                    | Arboretum                                   | Mac 9            | resin                              |
|                    | Arboretum                                   | Mac 10           | resin                              |
|                    | Arboretum                                   | Mac 11           | resin                              |
|                    | Arboretum                                   | Mac 12           | resin                              |
|                    | Arboretum                                   | Mac 13           | resin                              |
|                    | Arboretum                                   | Mac 14           | resin                              |
|                    | Arboretum                                   | Mac 15           | resin                              |
|                    | Arboretum                                   | Mac 16           | resin                              |
| <i>montana</i>     | Arboretum                                   | Mont 1           | resin                              |
|                    | Arboretum                                   | Mont 2           | resin                              |
|                    | Arboretum                                   | Mont 3           | resin                              |
|                    | Arboretum                                   | Mont 4           | resin                              |
|                    | Arboretum                                   | Mont 5           | resin                              |
| <i>moorei</i>      | Arboretum                                   | Moor 1           | resin                              |
|                    | Arboretum                                   | Moor 2           | resin                              |
|                    | Arboretum                                   | Moor 3           | resin                              |
|                    | Arboretum                                   | Moor 4           | resin                              |
| <i>ovata</i>       | Arboretum                                   | Ova 1            | resin                              |
|                    | Arboretum                                   | Ova 2            | resin                              |
|                    | Arboretum                                   | Ova 3            | resin                              |
|                    | Wild at Yaté                                | Ova 20           | resin                              |

# Uncovering the natural variability of araucariacean exudates from ex situ and in situ tree populations in New Caledonia

Seyfullah et al.

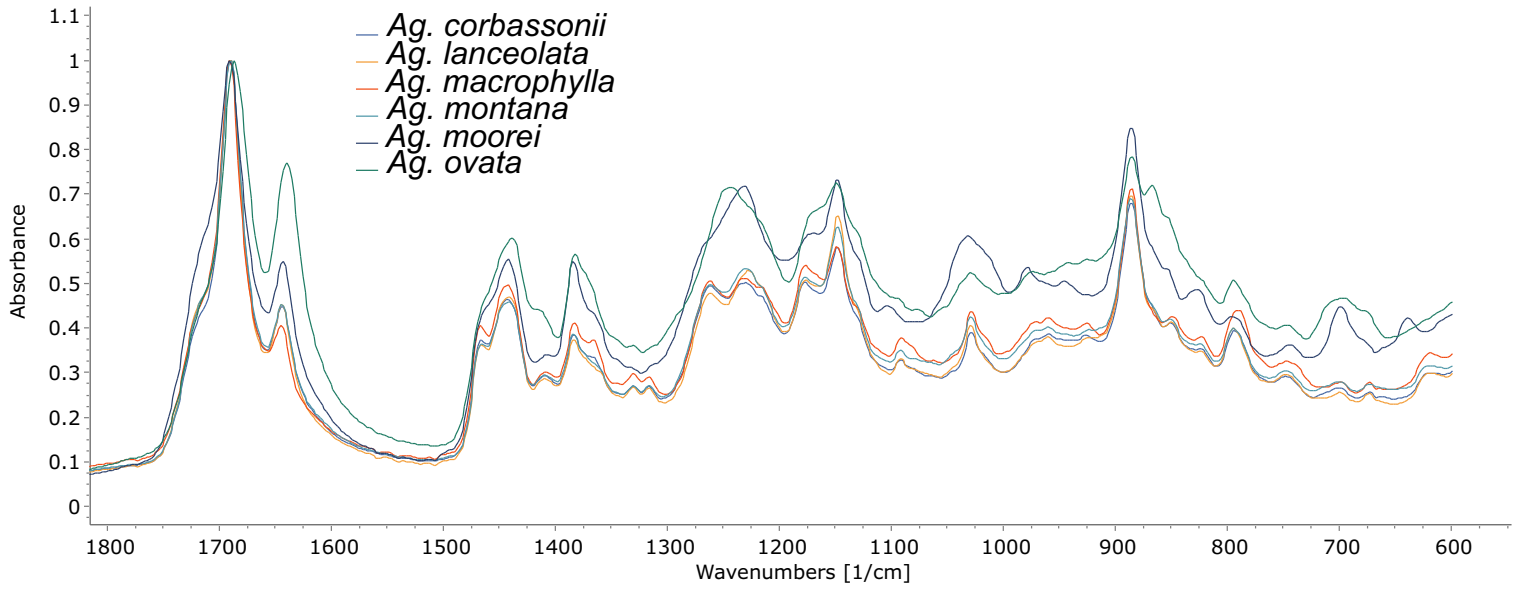

Supplementary Fig. S1. Fingerprint region of FTIR spectra of different exudates from *Agathis* species present at the arboretum in New Caledonia (full spectra given in Fig. 4)

# Uncovering the natural variability of araucariacean exudates from ex situ and in situ tree populations in New Caledonia

Seyfullah et al.

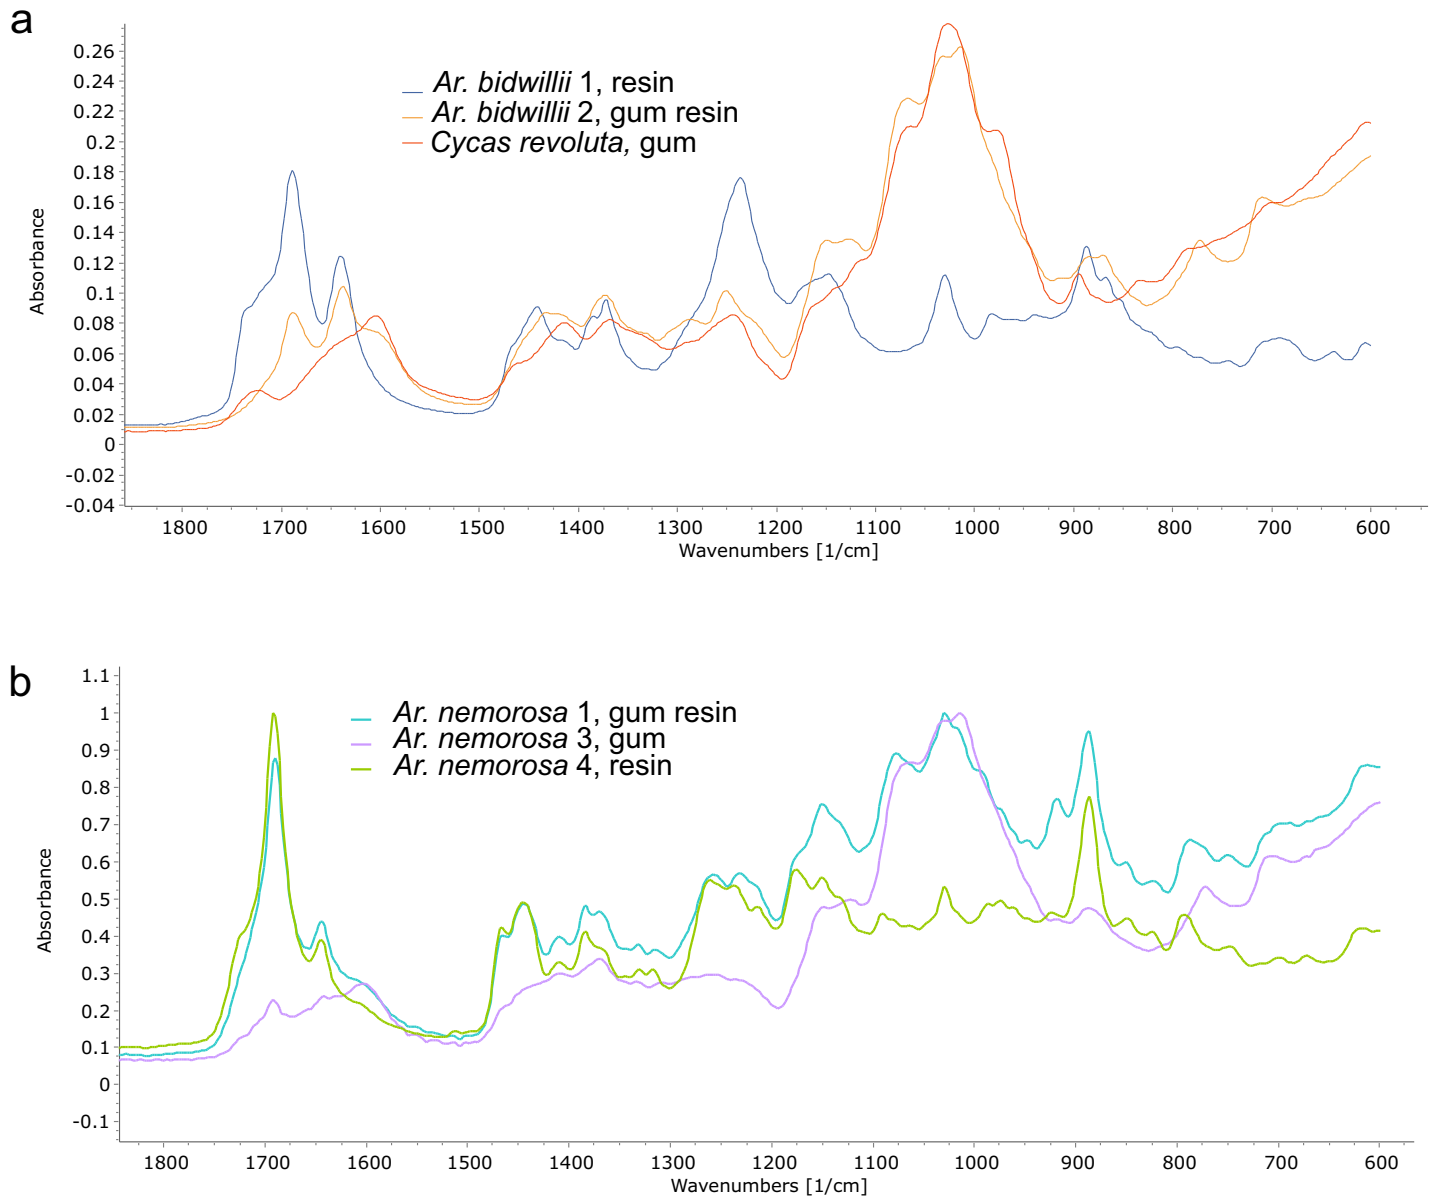

Supplementary Fig. S2. Fingerprint region of FTIR spectra of different exudates types from a single species. Full spectra given in Fig. 5.

(a) *Araucaria bidwillii* from the arboretum produced both a resin (*Ar. bidwillii* 1) and a gum resin (*Ar. bidwillii* 2) and are compared against a gum spectrum from *Cycas*.

(b) Wild-sourced *Araucaria nemorosa* produced three exudate types: a gum resin (*Ar. nemorosa* 1), a gum (*Ar. nemorosa* 3) and a resin (*Ar. nemorosa* 4).

# Uncovering the natural variability of araucariacean exudates from ex situ and in situ tree populations in New Caledonia

Seyfullah et al.

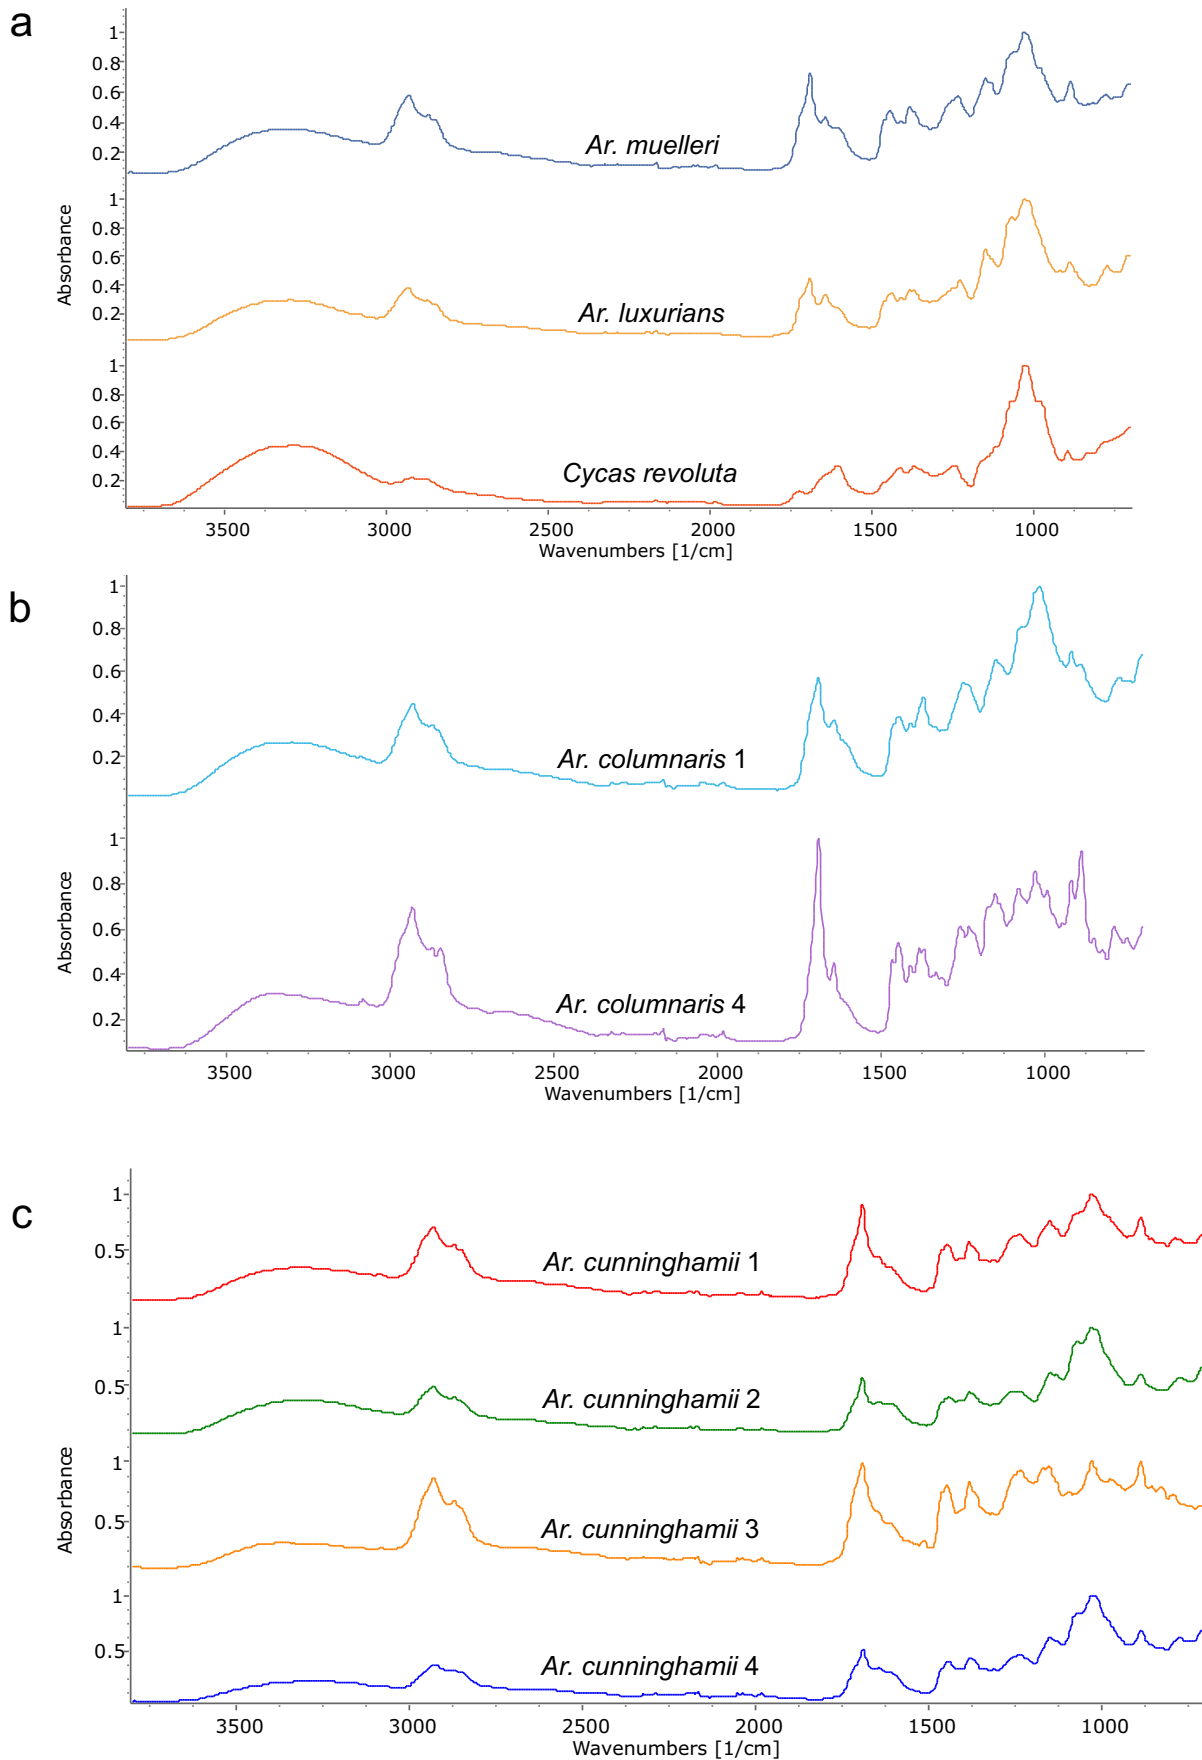

Supplementary Fig. S3. FTIR spectra of different exudates from New Caledonia.

(a) Gum resins of *Ar. luxurians* and *Ar. muelleri* (arboretum-sourced) compared against *Cycas* gum, (b) exudates from wild-sourced *Ar. columnaris*, a gum resin (*Ar. columnaris 1*) and a resin (*Ar. columnaris 4*), (c) exudates from arboretum-sourced *Ar. cunninghamii*, *Ar. cunninghamii 1*, *2*, *4* are gum resins, *Ar. cunninghamii 3* is a resin.

# Uncovering the natural variability of araucariacean exudates from ex situ and in situ tree populations in New Caledonia

Seyfullah et al.

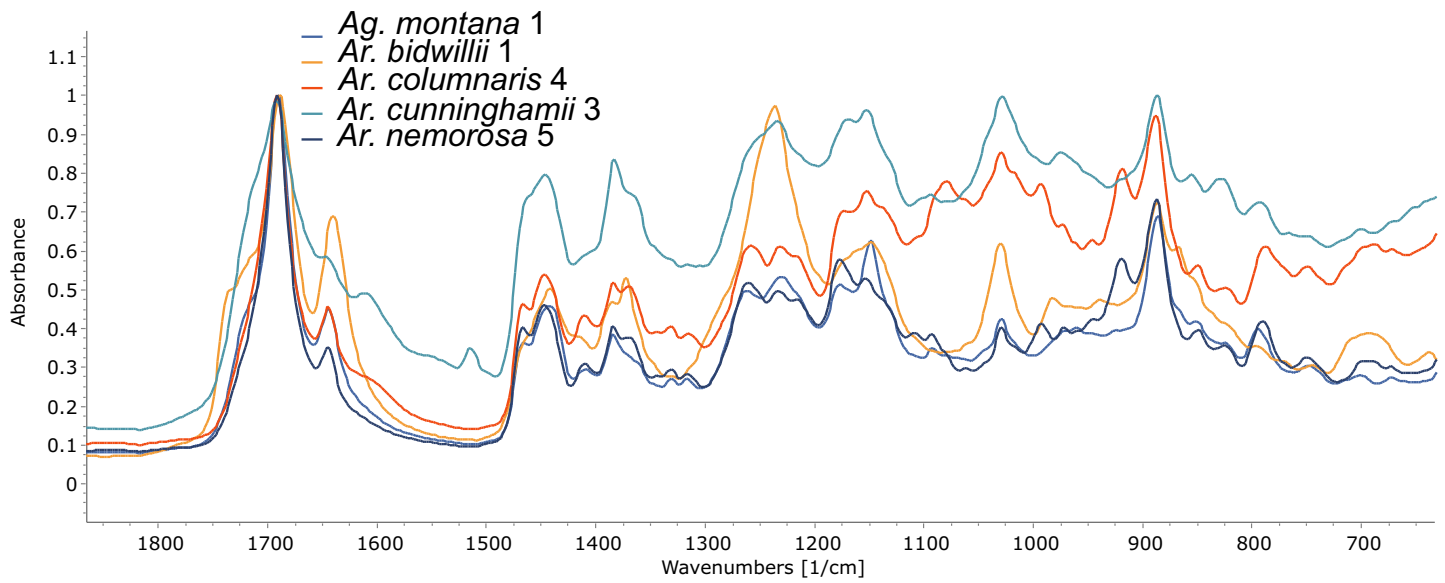

Supplementary Fig. S4. Fingerprint region of FTIR spectra of resins from different *Araucaria* species, with a resin from *Agathis montana* for comparison.

Uncovering the natural variability of araucariacean exudates from ex situ and in situ tree populations in New Caledonia

Seyfullah et al.

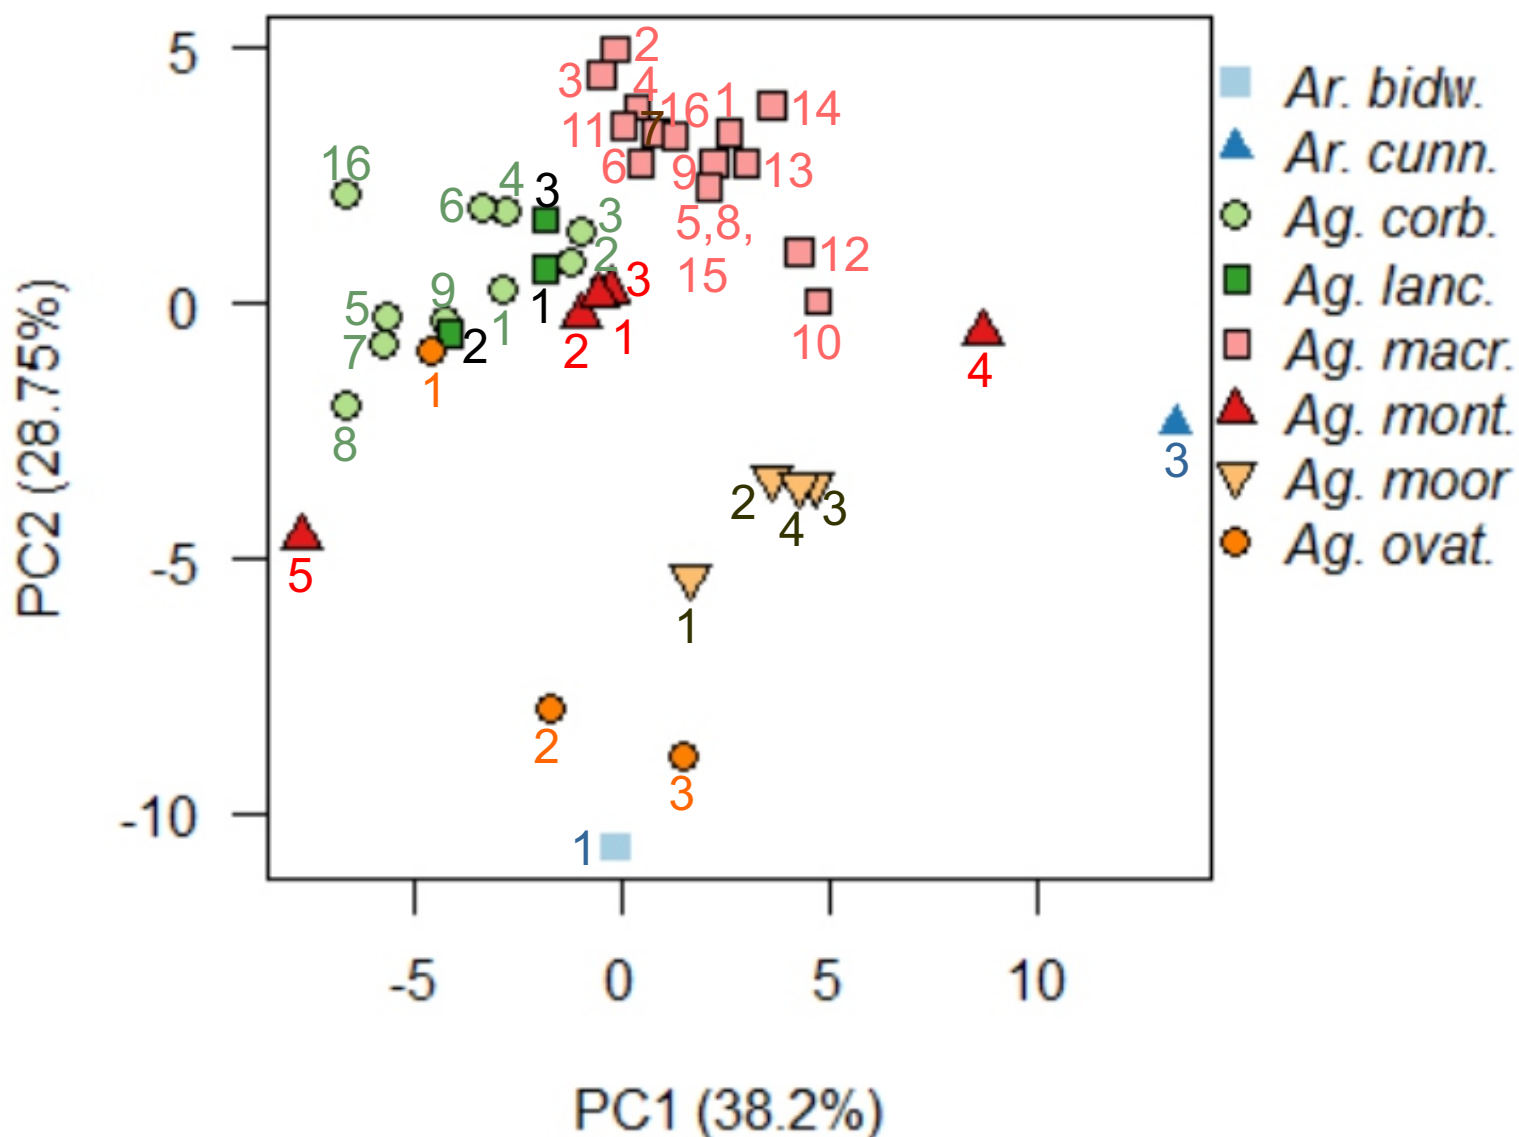

Supplementary Fig. S5. Enlarged PCA showing the resin FTIR spectra sourced from the arboretum (shown in Fig. 7a) with the samples labelled following Table 1.

# Uncovering the natural variability of araucariacean exudates from ex situ and in situ tree populations in New Caledonia

Seyfullah et al.

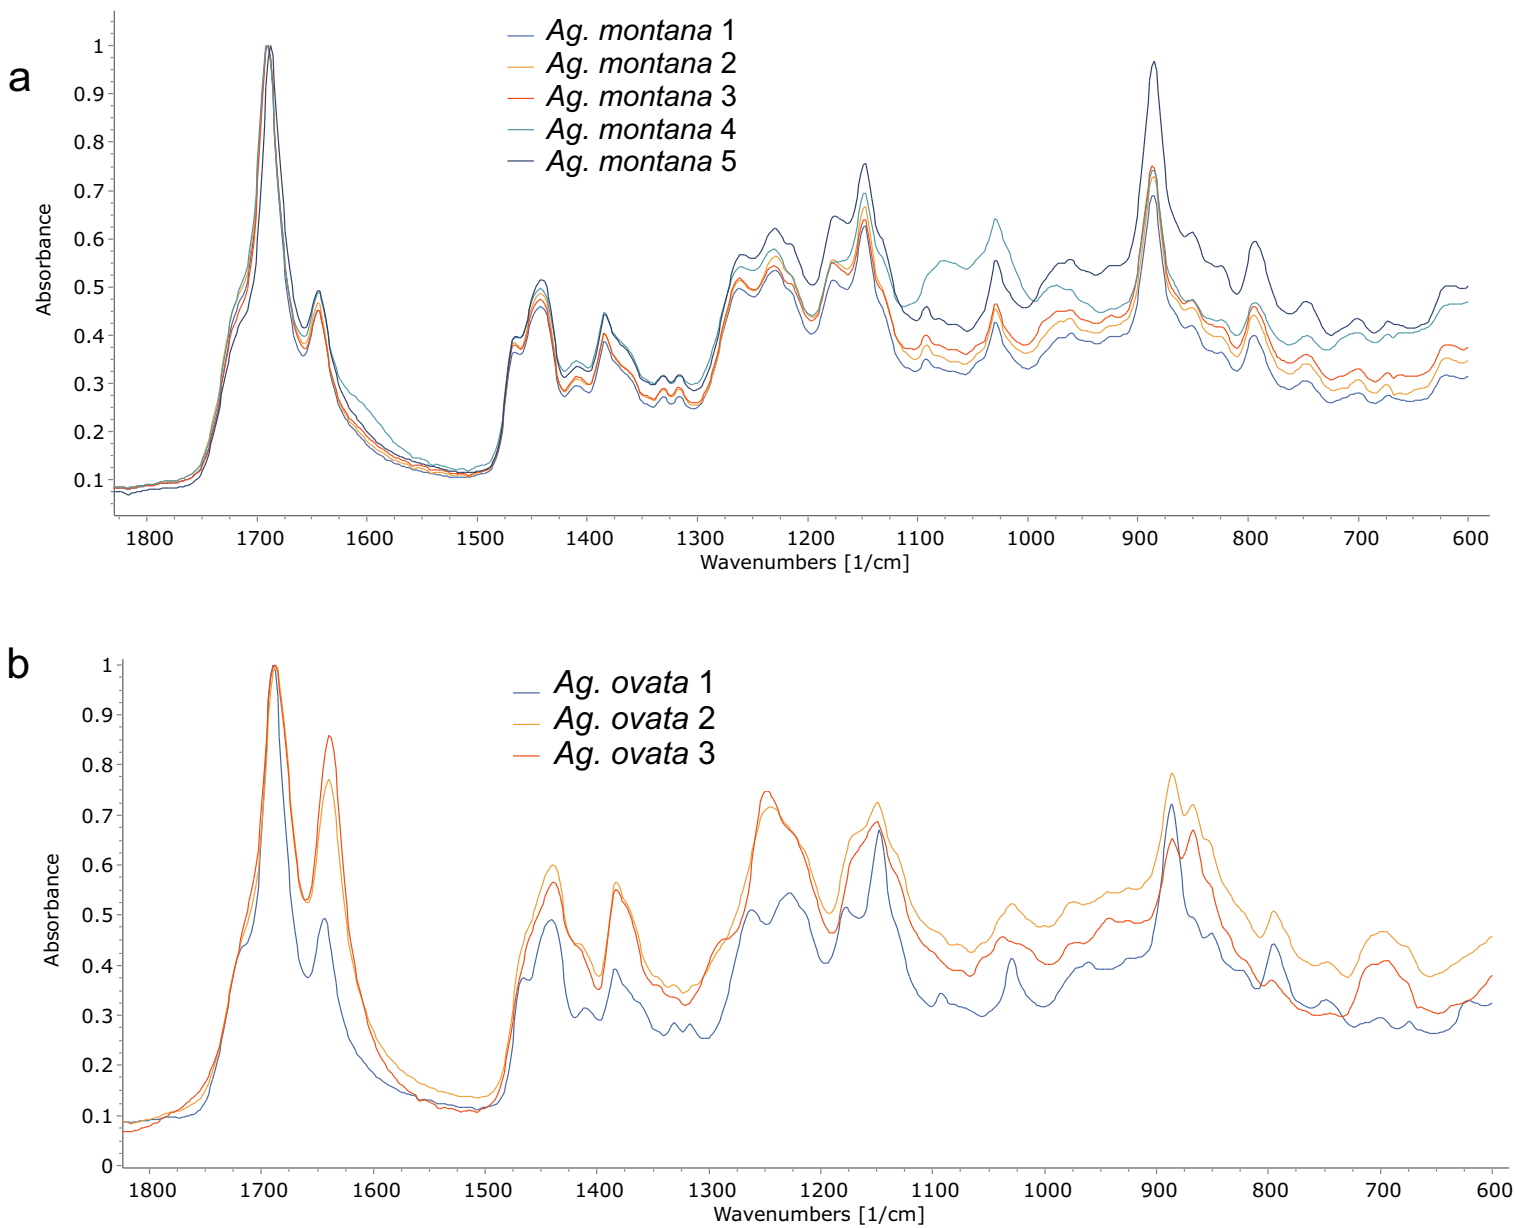

Supplementary Fig. S6. Fingerprint region of FTIR spectra of resins from different *Agathis* species (full spectra given in Fig. 8), all arboretum sourced. (a) *Ag. montana* resins. (b) *Ag. ovata* resins.



# Uncovering the natural variability of araucariacean exudates from ex situ and in situ tree populations in New Caledonia

Seyfullah et al.

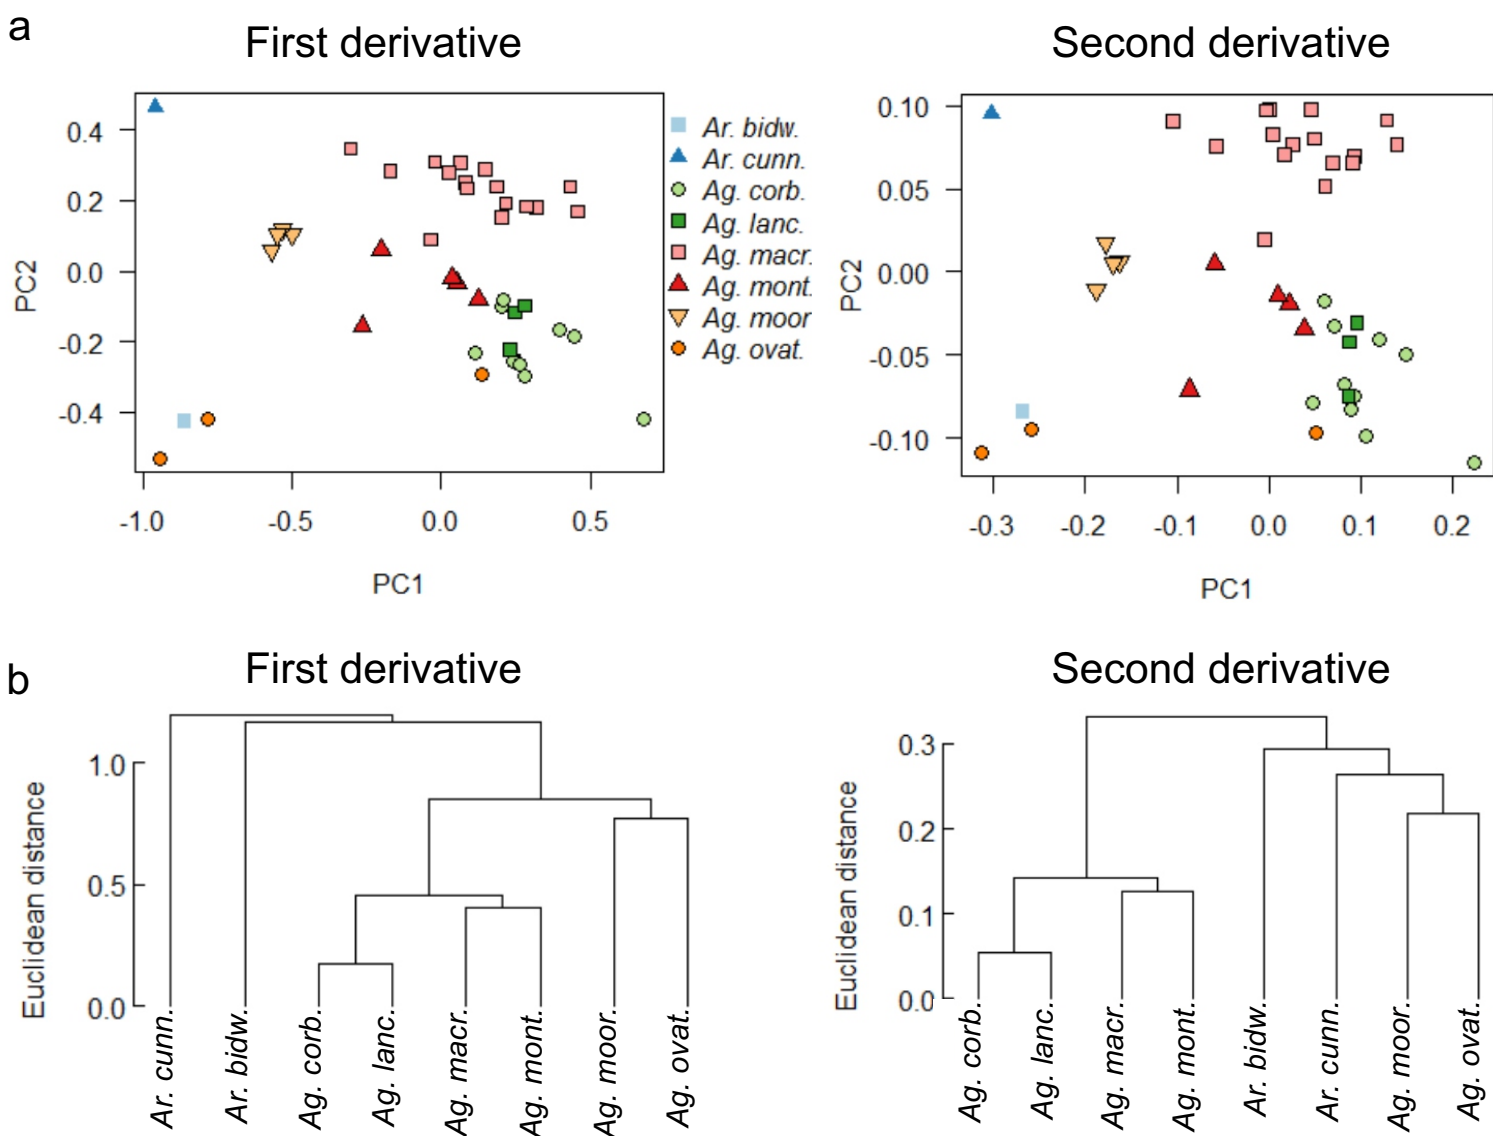

Supplementary Fig. S7. Multivariate analyses using derivatives of the resin FTIR spectra sourced from the arboretum.

(a) PCA analyses,

(b) taxon-mean spectra cluster analyses. Taxa and numbers of samples same as in Fig.7.

Uncovering the natural variability of araucariacean exudates from ex situ and in situ tree populations in New Caledonia

Seyfullah et al.

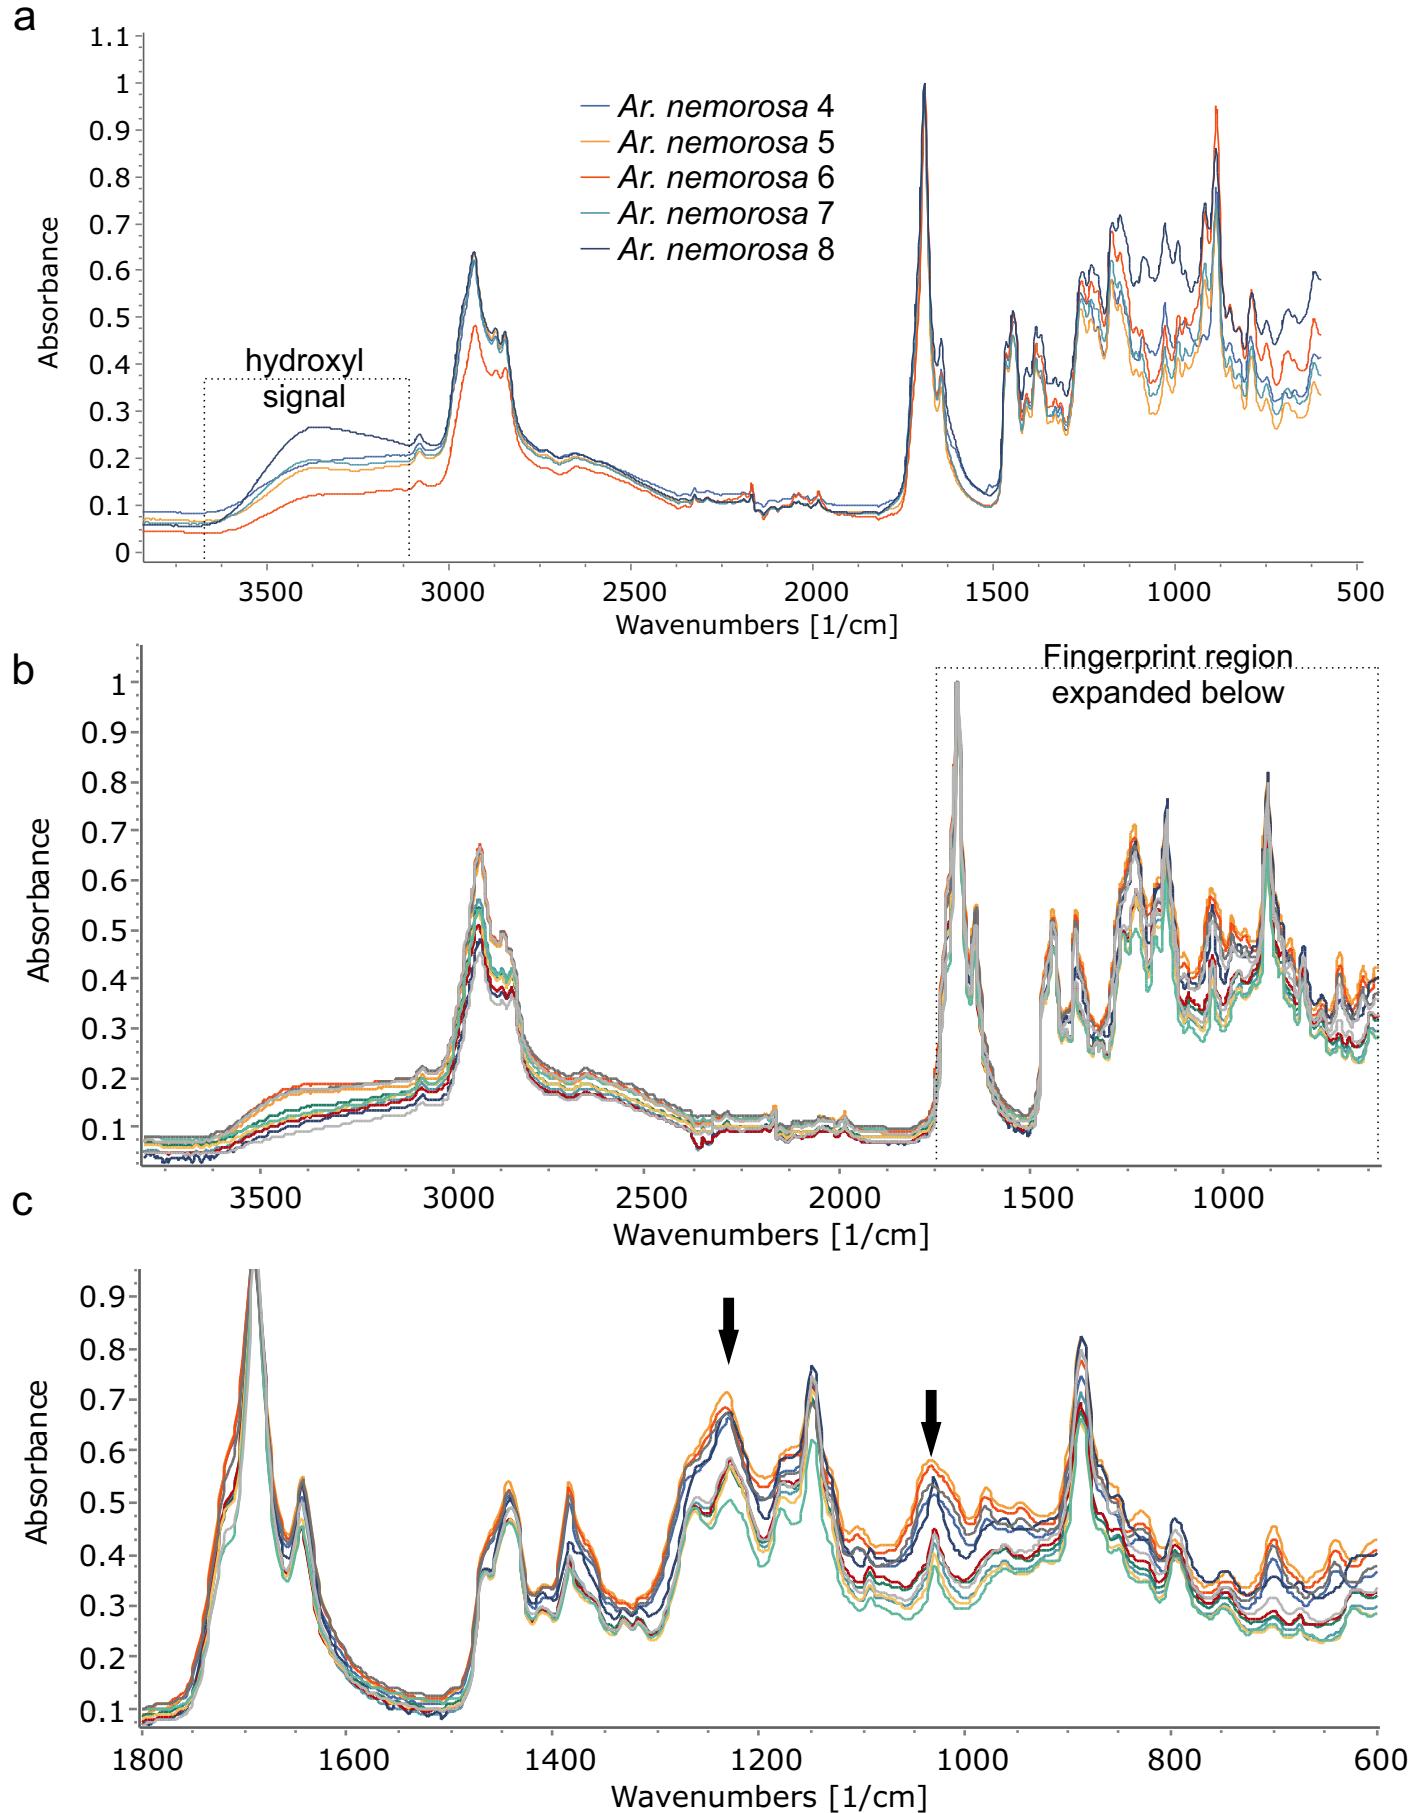

Supplementary Fig. S8. Variation across resin FTIR spectra from wild-sourced trees. (a) *Ar. nemorosa* resins with the greatest variation shown in the  $3,400\text{--}2,700\text{ cm}^{-1}$  region potentially indicating differing levels of polymerisation. (b)-(c) variation in *Ag. lanceolata* resins, (b) overview of spectra, (c) detail of fingerprint region where the majority of the spread of the spectra is due to differing peak intensities (black arrows).

Uncovering the natural variability of araucariacean exudates from ex situ and in situ tree populations in New Caledonia

Seyfullah et al.

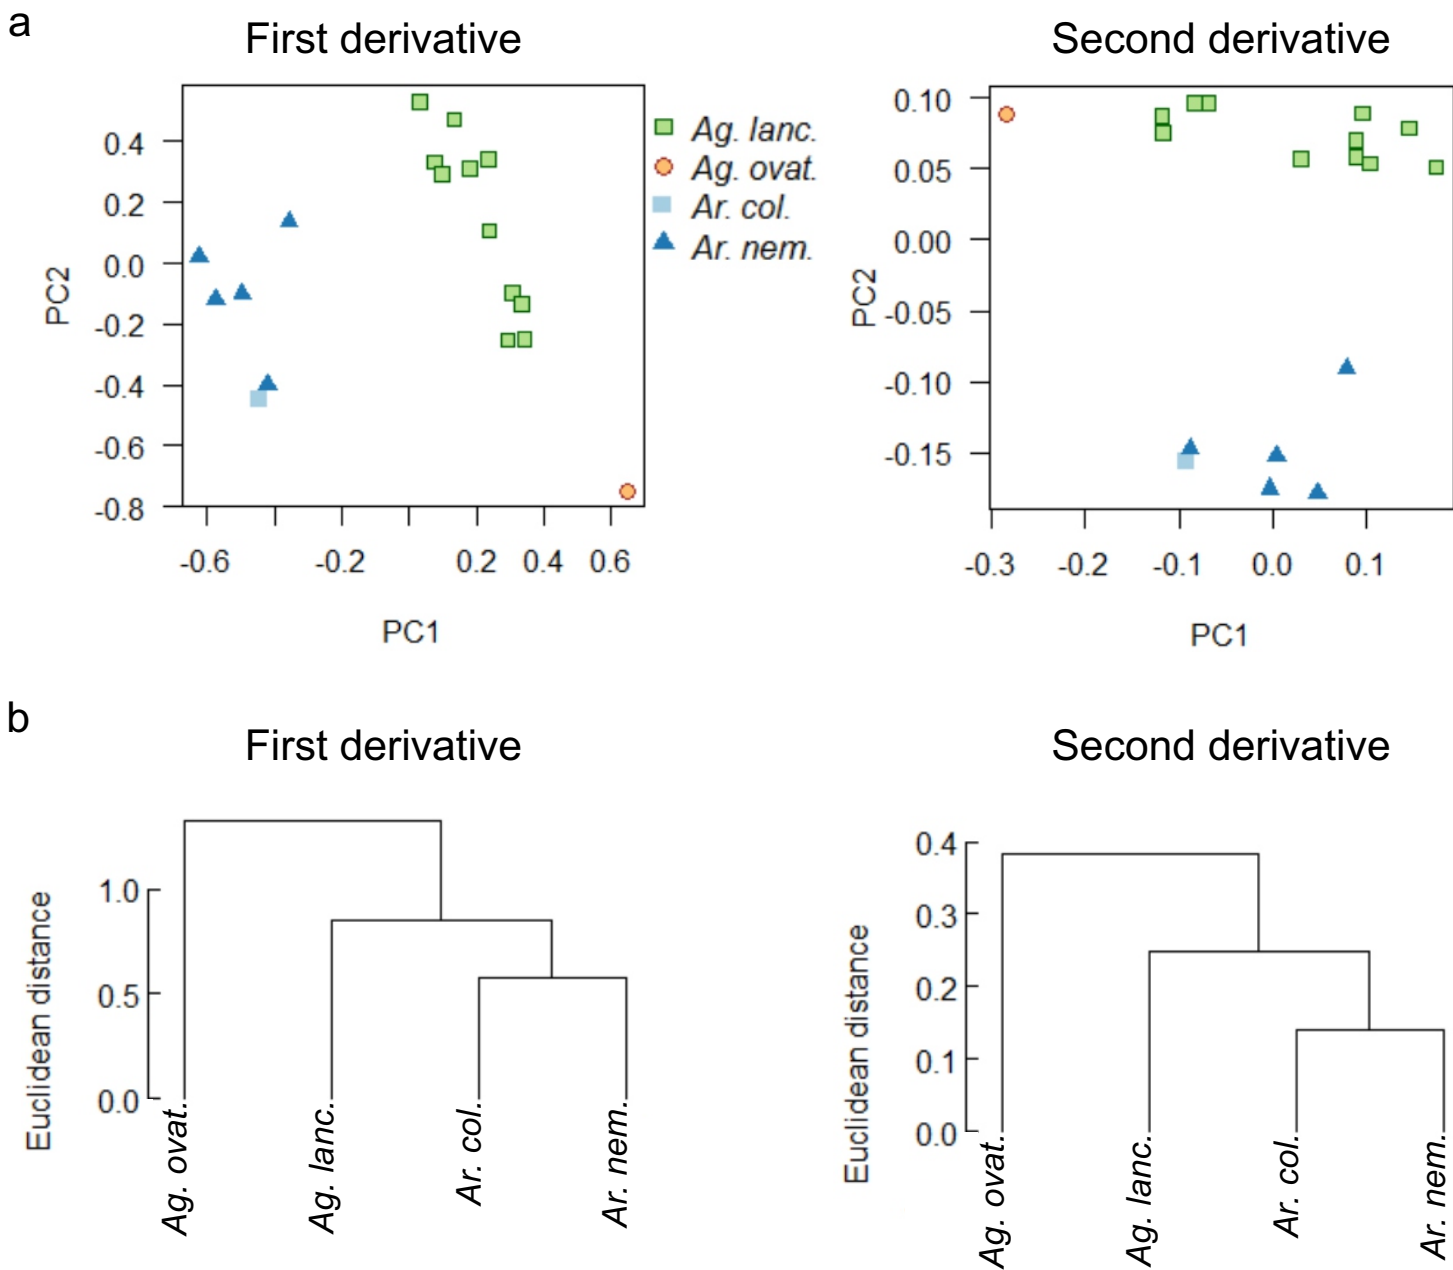

Supplementary Fig. S9. Multivariate analyses using derivatives of the resin FTIR spectra sourced from the wild.

(a) PCA analyses,

(b) taxon-mean spectra cluster analyses

Uncovering the natural variability of araucariacean exudates from ex situ and in situ tree populations in New Caledonia

Seyfullah et al.

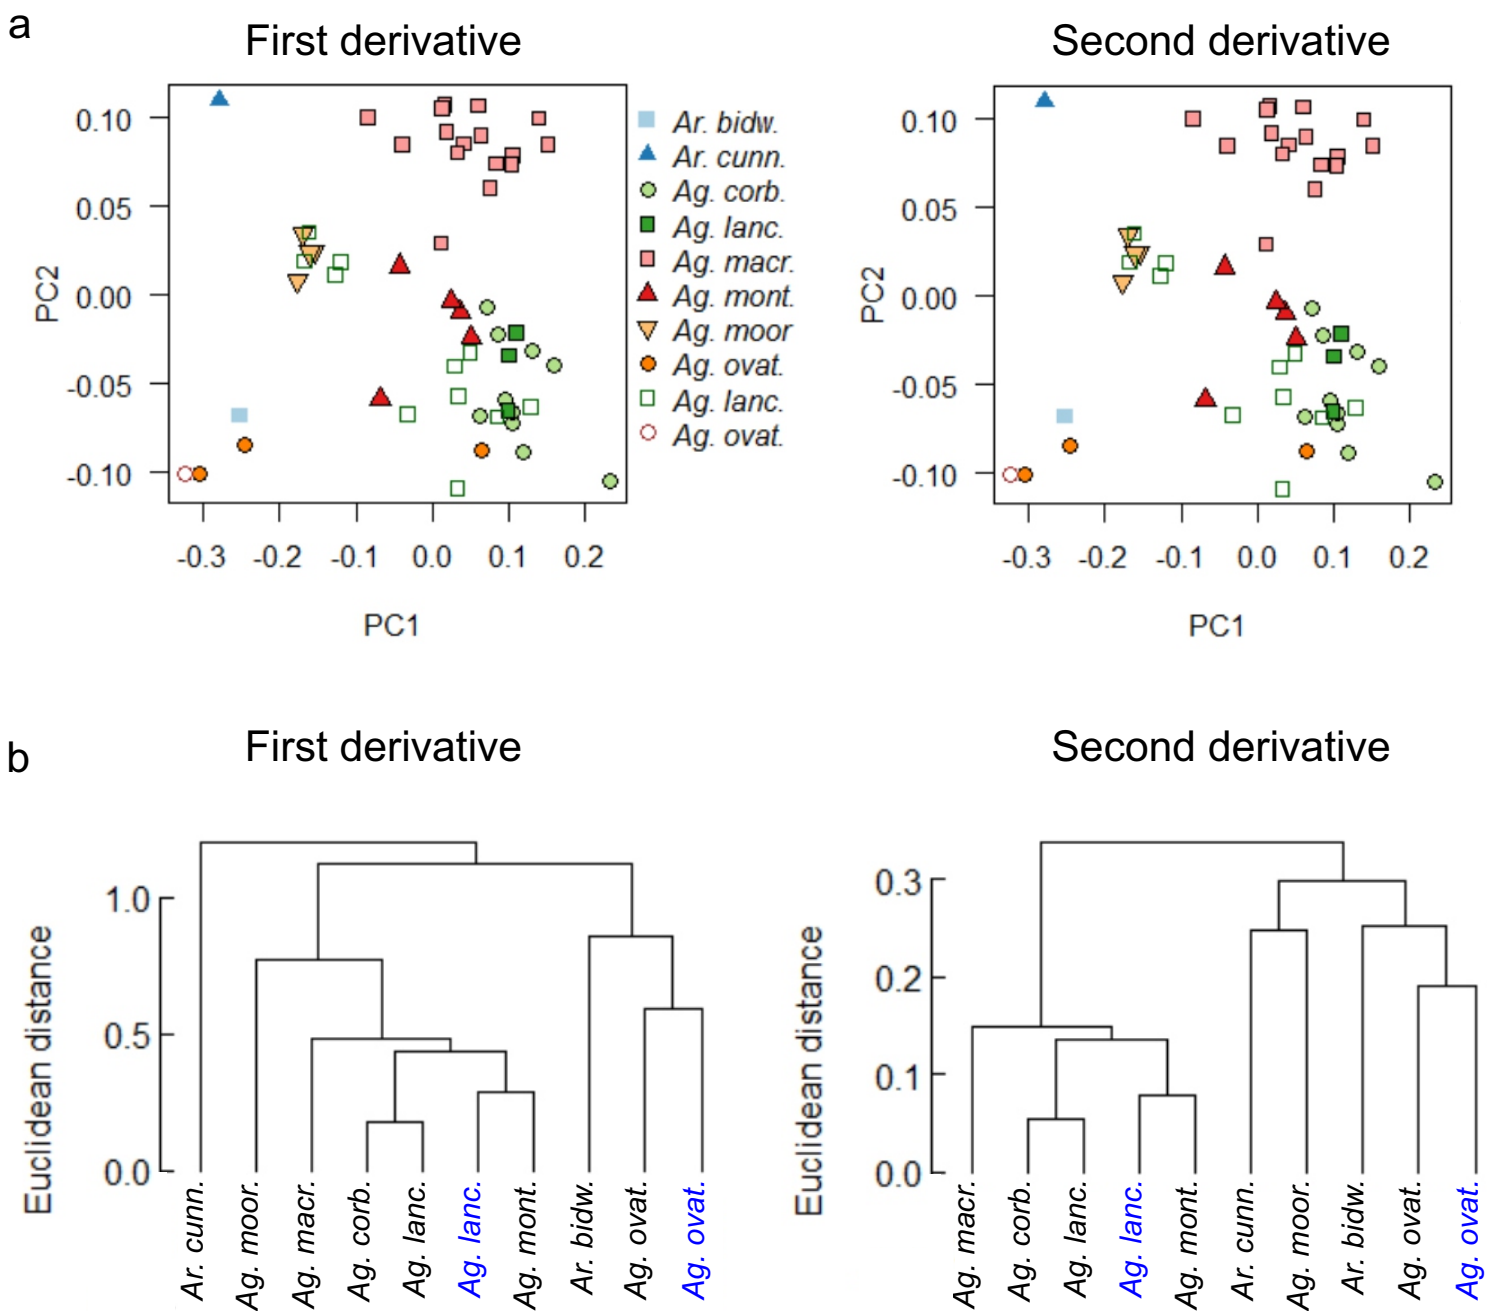

Supplementary Fig. S10. Multivariate analyses using derivatives of the resin FTIR spectra that occur in the arboretum and in the wild.

(a) PCA analyses, closed symbols indicate arboretum-derived resins, open symbols wild-derived.

(b) taxon-mean spectra cluster analyses, arboretum-derived samples in black, wild-derived in blue.
